# Supplementary material for: Targeted metabolomics of nucleotide intermediates for biomarker discovery in acute kidney injury
Source: Royal Society of Chemistry journal article supplement (doi:10.1039/d5ay01324k), 2025-12-20
Supplement: d5ay01324k1.pdf [file d5ay01324k1.pdf]

## Supplementary Information

### Targeted Metabolomics of Nucleotide Intermediates for Biomarker Discovery in Acute Kidney Injury

Xiaona Li <sup>a,b,1</sup>, Sihan Wang <sup>a,c,1</sup>, Zhini Liu <sup>a,c</sup>, Yuqi Jia <sup>a,b</sup>, Xiuli Su <sup>d</sup>, Changqing Yang <sup>c</sup>, Qinggang Ge <sup>\*</sup>,  
<sup>e</sup>, Libo Zhao <sup>\*,a,b</sup>, Rongsheng Zhao <sup>\*,a,b</sup>

*a* Department of Pharmacy, Peking University Third Hospital, Beijing 100191, China

*b* Therapeutic Drug Monitoring and Clinical Toxicology Center of Peking University, Beijing 100191, China

*c* School of Basic Medicine and Clinical Pharmacy, China Pharmaceutical University, Nanjing, Jiangsu Province 211198, China

*d* Eastern Institute of Technology, Ningbo, Zhejiang Province 315200, China

*e* Department of Intensive Care Unit, Peking University Third Hospital, Beijing 100191, China

#### Supplementary Information:

Text: Liquid chromatography conditions and MRM modes for purine and pyrimidine determination.

Table: MS parameters of the purine analytes and ISs in MRM mode (Table S1). MS parameters of the pyrimidine analytes and ISs in MRM mode (Table S2). Linear range, recovery rate of purine analytes (Table S3). Linear range, recovery rate of pyrimidine analytes (Table S4). Total mediation effects of metabolites on AKI (Table S5). Partial mediation effects of metabolites on AKI (Table S6). Reverse mediation effects of metabolites on AKI (Table S7). Mortality and inpatient days comparison between NAKI and AKI groups (n = 116) (Table S8). Logistic regression analysis of renal function recovery at d3 and metabolite concentrations at AKI onset (Table S9).

Figure: The schematic view of purine and pyrimidine metabolism (Figure S1). Permutation test of PLS-DA score plot (Figure S2). Purines and pyrimidines differences in urine (A) and plasma (B) samples of NAKI and AKI group (Figure S3). Correlation hot plot between metabolites and kidney function indicators in plasma (Figure S4). Binary logistic regression models of risk factors for AKI occurrence in urine and plasma (Figure S5). Comparison of nucleotide metabolite levels between KDIGO stage 1 and combined stages 2/3 (Figure S6).

## **Text**

### **Liquid chromatography conditions for purine and pyrimidine determination**

#### **Targeted analysis of purines:**

Mobile phase: A consists of ACN-H<sub>2</sub>O (95:5, v/v) with 10 mmol/L ammonium formate and 0.4% acetic acid; B consists of ACN-H<sub>2</sub>O (50:50, v/v) with 20 mmol/L ammonium formate and 0.1% FA.

Mass spectrometry parameters: positive ion mode, ion spray voltage: 5000 V, and the ion source temperature was set at 600°C. The pressure of the nebulizer gas and the heated gas: both 50 psi; curtain gas: 30 psi; the pressure of collision-induced dissociation (CID) gas: 10 psi.

#### **Targeted analysis of pyrimidines:**

Mobile phase: A consists of ACN-H<sub>2</sub>O (95:5, v/v) with 10 mmol/L ammonium formate and 0.1% ammonia solution; mobile phase B consists of ACN-H<sub>2</sub>O (50:50, v/v) with 20 mmol/L ammonium formate and 0.1% ammonia solution.

Mass spectrometry parameters: positive ion mode, ion spray voltage: 5500 V, and the ion source temperature was set at 550°C. The pressure of the nebulizer gas and the heated gas: 40 and 55 psi, respectively; curtain gas: 20 psi; the pressure of CID gas: 9 psi.

The elution gradients were as follows: The flow rate was 0.3 mL/min. The elution gradients were as follows: 0–5 min, 6% B; 5–7 min, 6–40% B; 7–9 min, 40–57% B; 9–9.5 min, 57–95% B; 9.5–10.5min, 95% B; 10.5–11.5min, 95–6% B; and 11.5–14.5min, 6% B. The column temperature was set at 30 °C. The autosampler was set at 6 °C and the injected volume was 5 µL.

**Table S1** MS parameters of the purine analytes and ISs in MRM mode

| No. | Compound                                                      | Precursor ion<br>( <i>m/z</i> ) | Product ion<br>( <i>m/z</i> ) | DP<br>(volts) | EP<br>(volts) | CE<br>(volts) | CXP<br>(volts) | Dwell Time<br>(msec) |
|-----|---------------------------------------------------------------|---------------------------------|-------------------------------|---------------|---------------|---------------|----------------|----------------------|
| 1   | Adenine                                                       | 136.0                           | 119.1                         | 88            | 13            | 30            | 12             | 15                   |
| 2   | Guanine                                                       | 152.0                           | 135.1                         | 74            | 4             | 27            | 12             | 15                   |
| 3   | Xanthine                                                      | 153.0                           | 110.1                         | 86            | 14            | 27            | 9              | 15                   |
| 4   | Hypoxanthine                                                  | 136.9                           | 110.2                         | 104           | 14            | 28            | 10             | 15                   |
| 5   | Adenosine                                                     | 268.1                           | 136.2                         | 74            | 13            | 60            | 12             | 15                   |
| 6   | Guanosine                                                     | 284.2                           | 152.2                         | 84            | 11            | 15            | 13             | 15                   |
| 7   | Inosine                                                       | 269.1                           | 137.3                         | 66            | 13            | 13            | 12             | 15                   |
| 8   | Xanthosine                                                    | 285.1                           | 153.1                         | 80            | 11            | 15            | 13             | 15                   |
| 9   | Deoxyadenosine                                                | 252.2                           | 136.2                         | 70            | 9             | 17            | 12             | 15                   |
| 10  | Deoxyguanosine                                                | 268.1                           | 152.1                         | 70            | 7             | 15            | 12             | 15                   |
| 11  | Deoxyinosine                                                  | 253.1                           | 137.2                         | 60            | 10            | 12            | 11             | 15                   |
| 12  | AMP                                                           | 348.0                           | 136.3                         | 70            | 14            | 25            | 12             | 15                   |
| 13  | GMP                                                           | 364.2                           | 152.2                         | 66            | 8             | 20            | 13             | 15                   |
| 14  | IMP                                                           | 349.0                           | 137.3                         | 70            | 9             | 17            | 11             | 15                   |
| 15  | XMP                                                           | 365.2                           | 97.3                          | 68            | 10            | 25            | 8              | 15                   |
| 16  | cAMP                                                          | 330.1                           | 136.3                         | 92            | 11            | 35            | 12             | 15                   |
| 17  | IS <sup>1</sup> (4-Cholorophrenoalanine)                      | 200.0                           | 154.0                         | 62            | 6             | 18            | 14             | 15                   |
| 18  | IS <sup>2</sup> (Hypoxanthine- <sup>15</sup> N <sub>4</sub> ) | 141.0                           | 123.1                         | 92            | 11            | 28            | 9              | 15                   |

**Table S2** MS parameters of the pyrimidine analytes and ISs in MRM mode

| No. | Compound                                                      | Precursor ion<br>( <i>m/z</i> ) | Product ion<br>( <i>m/z</i> ) | DP<br>(volts) | EP<br>(volts) | CE<br>(volts) | CXP<br>(volts) | Dwell Time<br>(msec) |
|-----|---------------------------------------------------------------|---------------------------------|-------------------------------|---------------|---------------|---------------|----------------|----------------------|
| 1   | Uracil                                                        | 113.0                           | 70.1                          | 106           | 12            | 23            | 12             | 25                   |
| 2   | Cytosine                                                      | 112.1                           | 95.0                          | 68            | 9             | 28            | 5              | 25                   |
| 3   | Thymine                                                       | 127.1                           | 110.1                         | 70            | 3             | 23            | 12             | 25                   |
| 4   | Uridine                                                       | 245.0                           | 113.0                         | 54            | 6             | 13            | 6              | 25                   |
| 5   | Cytidine                                                      | 244.0                           | 112.1                         | 38            | 7             | 17            | 9              | 25                   |
| 6   | Thymidine                                                     | 243.0                           | 127.0                         | 46            | 4             | 13            | 12             | 25                   |
| 7   | Deoxyuridine                                                  | 229.1                           | 113.0                         | 46            | 4             | 13            | 10             | 25                   |
| 8   | Deoxycytidine                                                 | 250.0                           | 134.1                         | 68            | 10            | 17            | 9              | 25                   |
| 9   | UMP                                                           | 325.0                           | 97.2                          | 60            | 7             | 20            | 5              | 25                   |
| 10  | CMP                                                           | 324.0                           | 112.1                         | 60            | 4             | 17            | 11             | 25                   |
| 11  | TMP                                                           | 323.0                           | 81.1                          | 60            | 5             | 25            | 7              | 25                   |
| 12  | Dihydrouracil                                                 | 115.0                           | 73.0                          | 110           | 10            | 17            | 13             | 25                   |
| 13  | Dihydrothymine                                                | 129.0                           | 69.1                          | 122           | 4             | 20            | 12             | 25                   |
| 15  | IS <sup>3</sup> (Cytidine- <sup>15</sup> N <sub>3</sub> )     | 247.0                           | 115.1                         | 42            | 4             | 17            | 10             | 25                   |
| 16  | IS <sup>2</sup> (Hypoxanthine- <sup>15</sup> N <sub>4</sub> ) | 141.0                           | 123.1                         | 92            | 11            | 28            | 9              | 25                   |

**Table S3** Linear range, recovery rate of purine analytes

| No. | Compound     | Linear range |            | Recovery (%) |        |       |
|-----|--------------|--------------|------------|--------------|--------|-------|
|     |              | Plasma       | Urine      | QC level     | Plasma | Urine |
| 1   | Adenine      | 10-2000      | 8-400      | LQC          | 102.9  | 107.2 |
|     |              |              |            | MQC          | 90.8   | 100.2 |
|     |              |              |            | HQC          | 110.1  | 92.5  |
| 2   | Guanine      | 2.5-8000     | 10-800     | LQC          | 97.4   | 108.8 |
|     |              |              |            | MQC          | 99.9   | 95.3  |
|     |              |              |            | HQC          | 106.5  | 104.6 |
| 3   | Xanthine     | 90-14400     | 4000-40000 | LQC          | 101.6  | 99.6  |
|     |              |              |            | MQC          | 94.1   | 91.4  |
|     |              |              |            | HQC          | 101.0  | 90.7  |
| 4   | Hypoxanthine | 90-36000     | 100-40000  | LQC          | 101.4  | 96.2  |
|     |              |              |            | MQC          | 108.9  | 110.2 |
|     |              |              |            | HQC          | 100.8  | 94.1  |
| 5   | Adenosine    | 15-6000      | 120-12000  | LQC          | 95.1   | 108.9 |
|     |              |              |            | MQC          | 95.7   | 108.7 |
|     |              |              |            | HQC          | 98.9   | 91.1  |
| 6   | Guanosine    | 6-600        | 200-4000   | LQC          | 102.2  | 99.9  |
|     |              |              |            | MQC          | 94.6   | 92.9  |
|     |              |              |            | HQC          | 108.0  | 94.1  |
| 7   | Inosine      | 10-4000      | 400-8000   | LQC          | 106.3  | 104.9 |
|     |              |              |            | MQC          | 101.0  | 100.3 |
|     |              |              |            | HQC          | 106.9  | 100.2 |

|    |                |             |            |     |       |       |
|----|----------------|-------------|------------|-----|-------|-------|
| 8  | Xanthosine     | <i>N.A.</i> | 2400-12000 | LQC | N.A.  | 96.9  |
|    |                |             |            | MQC | N.A.  | 100.7 |
|    |                |             |            | HQC | N.A.  | 103.2 |
| 9  | Deoxyadenosine | 2.5-1000    | 6.67-400   | LQC | 94.9  | 110.7 |
|    |                |             |            | MQC | 99.9  | 92.1  |
|    |                |             |            | HQC | 105.1 | 87.4  |
| 10 | Deoxyguanosine | 6-600       | 20-1200    | LQC | 97.8  | 99.9  |
|    |                |             |            | MQC | 95.5  | 96.1  |
|    |                |             |            | HQC | 105.9 | 111.7 |
| 11 | Deoxyinosine   | 50-5000     | 100-4000   | LQC | 105.5 | 100.2 |
|    |                |             |            | MQC | 89.1  | 93.3  |
|    |                |             |            | HQC | 109.7 | 109.2 |
| 12 | cAMP           | 10-1000     | 200-8000   | LQC | 101.0 | 107.8 |
|    |                |             |            | MQC | 98.6  | 87.5  |
|    |                |             |            | HQC | 89.7  | 101.6 |

Note: *N.A.* represented not applicable. AMP, GMP, CMP, and IMP were undetectable.

**Table S4** Linear range, recovery rate of pyrimidine analytes

| No. | Compound        | Linear range |           | Recovery (%) |        |       |
|-----|-----------------|--------------|-----------|--------------|--------|-------|
|     |                 | Plasma       | Urine     | QC level     | Plasma | Urine |
| 1   | Uracil          | 60-12000     | 24-12000  | LQC          | 101.2  | 99.8  |
|     |                 |              |           | MQC          | 102.8  | 102.5 |
|     |                 |              |           | HQC          | 97.2   | 102.6 |
| 2   | Cytosine        | 3-750        | 0.6-1500  | LQC          | 96.3   | 100.1 |
|     |                 |              |           | MQC          | 100.9  | 104.1 |
|     |                 |              |           | HQC          | 91.4   | 92.7  |
| 3   | Thymine         | 24-6000      | 4.8-12000 | LQC          | 94.9   | 98.6  |
|     |                 |              |           | MQC          | 100.1  | 105.7 |
|     |                 |              |           | HQC          | 87.8   | 92.6  |
| 4   | Uridine         | 2.4-3000     | 2.4-1200  | LQC          | 98.7   | 99.6  |
|     |                 |              |           | MQC          | 101.4  | 109.2 |
|     |                 |              |           | HQC          | 94.5   | 92.2  |
| 5   | Cytidine        | 1.2-3000     | 1.2-300   | LQC          | 100.6  | 99.8  |
|     |                 |              |           | MQC          | 99.1   | 98.5  |
|     |                 |              |           | HQC          | 94.6   | 96.8  |
| 6   | Thymidine       | 0.6-750      | 0.6-60    | LQC          | 100.0  | 98.7  |
|     |                 |              |           | MQC          | 107.0  | 96.5  |
|     |                 |              |           | HQC          | 96.3   | 100.9 |
| 7   | 2'-Deoxyuridine | 2-1000       | 0.2-250   | LQC          | 98.5   | 99.3  |
|     |                 |              |           | MQC          | 105.1  | 113.2 |
|     |                 |              |           | HQC          | 91.8   | 100.8 |

|    |                  |            |            |     |       |       |
|----|------------------|------------|------------|-----|-------|-------|
| 8  | 2'-Deoxycytidine | 5-1000     | 5-1000     | LQC | 114.1 | 91.7  |
|    |                  |            |            | MQC | 104.4 | 109.1 |
|    |                  |            |            | HQC | 85.4  | 95.3  |
| 9  | Dihydrouracil    | 1200-60000 | 1200-60000 | LQC | 97.2  | 93.2  |
|    |                  |            |            | MQC | 92.8  | 105.1 |
|    |                  |            |            | HQC | 94.7  | 88.5  |
| 10 | Dihydrothymine   | 1000-30000 | 300-12000  | LQC | 98.8  | 102.1 |
|    |                  |            |            | MQC | 100.3 | 109.7 |
|    |                  |            |            | HQC | 90.6  | 96.7  |

Note: CMP, UMP, and TMP were undetectable.



**Table S5** Total mediation effects of metabolites on AKI.

| Independent variable | Mediation variable | ACME (97.5% CI)                       | $P_{\text{mediation effect}}$ | ADE (97.5% CI)                        | $P_{\text{direct effect}}$ | Total Effect (97.5% CI)               | $P_{\text{total effect}}$ |
|----------------------|--------------------|---------------------------------------|-------------------------------|---------------------------------------|----------------------------|---------------------------------------|---------------------------|
| P. Hypoxanthine      | AST                | -0.019 (-0.079, -0.000 <sup>1</sup> ) | 0.012                         | -0.007 (-0.034, 0.037)                | 0.486                      | -0.026 (-0.053, -0.000 <sup>1</sup> ) | 0.018                     |
| P. Thymidine         | AST                | -0.058 (-0.163, -0.008)               | 0.016                         | -0.072 (-0.251, 0.061)                | 0.300                      | -0.130 (-0.312, -0.005)               | 0.046                     |
| U. Adenine           | eGFR               | -0.045 (-0.071, -0.009)               | <0.001                        | -0.024 (-0.038, 0.019)                | 0.274                      | -0.068 (-0.072, -0.017)               | 0.004                     |
| U. Xanthine          | eGFR               | -0.060 (-0.118, -0.022)               | <0.001                        | -0.035 (-0.065, 0.031)                | 0.206                      | -0.096 (-0.123, -0.043)               | <0.001                    |
| U. Hypoxanthine      | eGFR               | -0.083 (-0.179, -0.042)               | <0.001                        | -0.042 (-0.087, 0.075)                | 0.320                      | -0.124 (-0.169, -0.082)               | <0.001                    |
| U. Adenosine         | eGFR               | -0.055 (-0.122, -0.013)               | 0.010                         | -0.040 (-0.073, 0.028)                | 0.306                      | -0.095 (-0.143, -0.049)               | <0.001                    |
| U. 2'-Deoxyadenosine | eGFR               | -0.037 (-0.076, -0.018)               | <0.001                        | -0.034 (-0.055, 0.001)                | 0.058                      | -0.072 (-0.095, -0.043)               | <0.001                    |
| P. Hypoxanthine      | eGFR               | -0.043 (-0.079, -0.007)               | 0.002                         | -0.001 (-0.013, 0.040)                | 0.940                      | -0.044 (-0.058, -0.007)               | 0.014                     |
| U. Cytidine          | eGFR               | -0.063 (-0.106, -0.031)               | 0.002                         | -0.017 (-0.052, 0.041)                | 0.456                      | -0.080 (-0.117, -0.032)               | 0.004                     |
| U. Guanine           | Scr                | -0.045 (-0.071, -0.019)               | <0.001                        | -0.016 (-0.030, -0.000 <sup>1</sup> ) | 0.054                      | -0.060 (-0.086, -0.027)               | <0.001                    |
| U. Xanthine          | Scr                | -0.076 (-0.098, -0.024)               | <0.001                        | -0.018 (-0.035, 0.016)                | 0.346                      | -0.094 (-0.104, -0.031)               | <0.001                    |
| U. Hypoxanthine      | Scr                | -0.093 (-0.127, -0.036)               | <0.001                        | -0.028 (-0.048, 0.012)                | 0.218                      | -0.121 (-0.145, -0.054)               | <0.001                    |
| U. Cytidine          | Scr                | -0.056 (-0.089, -0.027)               | <0.001                        | -0.010 (-0.033, 0.022)                | 0.496                      | -0.066 (-0.102, -0.029)               | 0.004                     |
| P. Thymidine         | Scr                | -0.137 (-0.284, -0.019)               | 0.010                         | -0.051 (-0.125, 0.053)                | 0.270                      | -0.189 (-0.344, -0.047)               | 0.010                     |
| P. Thymidine         | UA                 | -0.102 (-0.187, -0.035)               | 0.004                         | -0.083 (-0.258, 0.072)                | 0.292                      | -0.185 (-0.359, -0.032)               | 0.016                     |
| U. Uridine           | Urea               | -0.032 (-0.064, -0.005)               | 0.020                         | -0.024 (-0.060, 0.017)                | 0.246                      | -0.056 (-0.096, -0.012)               | 0.018                     |

Note: ACME: Average Causal Mediation Effect. ADE: Average Direct Effect. If confidence interval and its value were less than 0.001, they were represented by NA. -0.000<sup>1</sup>: value less than -0.001; 0.000<sup>2</sup>: value less than 0.001

**Table S6** Partial mediation effects of metabolites on AKI.

| Independent variable | Mediation variable | ACME (97.5% CI)                       | $P_{\text{mediation effect}}$ | ADE (97.5% CI)                        | $P_{\text{direct effect}}$ | Total Effect (97.5% CI) | $P_{\text{total effect}}$ | Prop.Mediated |
|----------------------|--------------------|---------------------------------------|-------------------------------|---------------------------------------|----------------------------|-------------------------|---------------------------|---------------|
| U. Guanine           | eGFR               | -0.046 (-0.079, -0.019)               | <0.001                        | -0.028 (-0.047, -0.005)               | 0.020                      | -0.074 (-0.104, -0.037) | <0.001                    | 57%           |
| U. Adenosine         | Scr                | -0.038 (-0.116, -0.010)               | 0.016                         | -0.026 (-0.060, -0.000 <sup>1</sup> ) | 0.050                      | -0.064 (-0.146, -0.035) | <0.001                    | 59%           |
| U. 2'-Deoxyadenosine | Scr                | -0.030 (-0.052, -0.009)               | <0.001                        | -0.024 (-0.042, -0.005)               | 0.028                      | -0.054 (-0.081, -0.020) | <0.001                    | 48%           |
| U. Guanine           | UA                 | -0.013 (-0.027, -0.002)               | <0.001                        | -0.065 (-0.085, -0.027)               | <0.001                     | -0.078 (-0.099, -0.032) | <0.001                    | 13%           |
| U. Cytidine          | UA                 | -0.026 (-0.049, -0.004)               | 0.030                         | -0.061 (-0.089, -0.006)               | 0.032                      | -0.087 (-0.108, -0.032) | 0.004                     | 28%           |
| P. Cytosine          | UA                 | 0.039 (0.010, 0.082)                  | 0.002                         | 0.169 (0.085, 0.268)                  | <0.001                     | 0.208 (0.125, 0.303)    | <0.001                    | 19%           |
| U. Adenine           | Urea               | -0.010 (-0.031, -0.000 <sup>1</sup> ) | 0.026                         | -0.019 (-0.047, -0.002)               | 0.006                      | -0.029 (-0.061, -0.003) | <0.001                    | 24%           |
| U. Guanine           | Urea               | -0.016 (-0.031, -0.005)               | 0.006                         | -0.052 (-0.077, -0.025)               | <0.001                     | -0.069 (-0.093, -0.037) | <0.001                    | 19%           |
| U. Xanthine          | Urea               | -0.044 (-0.069, -0.015)               | <0.001                        | -0.047 (-0.074, -0.012)               | 0.006                      | -0.091 (-0.113, -0.046) | <0.001                    | 43%           |
| U. Adenosine         | Urea               | -0.032 (-0.090, -0.004)               | 0.028                         | -0.061 (-0.119, -0.013)               | 0.022                      | -0.093 (-0.160, -0.052) | <0.001                    | 33%           |
| U. 2'-Deoxyadenosine | Urea               | -0.021 (-0.040, -0.005)               | 0.002                         | -0.042 (-0.063, -0.011)               | 0.002                      | -0.063 (-0.083, -0.023) | <0.001                    | 28%           |
| P. Cytosine          | Urea               | 0.118 (0.064, 0.191)                  | <0.001                        | 0.099 (0.007, 0.211)                  | 0.038                      | 0.217 (0.142, 0.326)    | <0.001                    | 56%           |

Note: ACME: Average Causal Mediation Effect. ADE: Average Direct Effect. If confidence interval and its value were less than 0.001, they were represented by NA.

-0.000<sup>1</sup>: value less than -0.001; 0.000<sup>2</sup>: value less than 0.001

**Table S7** Reverse mediation effects of metabolites on AKI.

| Independent variable | Mediation variable   | ACME<br>(97.5% CI)                 | $p$ mediation effect | ADE<br>(97.5% CI)    | $p$ direct effect | Total Effect<br>(97.5% CI) | $p$ total effect | Prop. Mediated |
|----------------------|----------------------|------------------------------------|----------------------|----------------------|-------------------|----------------------------|------------------|----------------|
| eGFR                 | U. Guanine           | NA                                 | 0.014                | NA                   | <0.001            | NA                         | <0.001           | 12%            |
| eGFR                 | U. 2'-Deoxyadenosine | NA                                 | 0.036                | NA                   | <0.001            | NA                         | <0.001           | 9%             |
| Scr                  | U. Guanine           | NA                                 | 0.014                | NA                   | <0.001            | NA                         | <0.001           | 5%             |
| Scr                  | U. Adenosine         | NA                                 | 0.012                | NA                   | <0.001            | NA                         | <0.001           | 2%             |
| Scr                  | U. 2'-Deoxyadenosine | NA                                 | 0.004                | NA                   | <0.001            | NA                         | <0.001           | 5%             |
| UA                   | U. Guanine           | NA                                 | <0.001               | NA                   | 0.004             | NA                         | <0.001           | 33%            |
| UA                   | P. Cytosine          | NA                                 | <0.001               | NA                   | <0.001            | NA                         | <0.001           | 24%            |
| Urea                 | U. Adenine           | 0.002 (0.000 <sup>2</sup> , 0.006) | 0.028                | 0.020 (0.002, 0.031) | <0.001            | 0.022 (0.002, 0.034)       | <0.001           | 7%             |
| Urea                 | U. Guanine           | 0.003 (0.000 <sup>2</sup> , 0.007) | 0.004                | 0.017 (0.002, 0.029) | <0.001            | 0.020 (0.002, 0.034)       | <0.001           | 12%            |
| Urea                 | U. Xanthine          | 0.002 (0.000 <sup>2</sup> , 0.006) | 0.006                | 0.016 (0.001, 0.029) | <0.001            | 0.018 (0.002, 0.033)       | <0.001           | 8%             |
| Urea                 | U. 2'-Deoxyadenosine | 0.003 (0.000 <sup>2</sup> , 0.010) | 0.002                | 0.018 (0.002, 0.029) | <0.001            | 0.021 (0.002, 0.036)       | <0.001           | 13%            |
| Urea                 | P. Cytosine          | 0.003 (0.000 <sup>2</sup> , 0.009) | 0.038                | 0.014 (0.002, 0.027) | <0.001            | 0.017 (0.002, 0.033)       | <0.001           | 13%            |

Note: ACME: Average Causal Mediation Effect. ADE: Average Direct Effect. If confidence interval and its value were less than 0.001, they were represented by NA. -0.000<sup>1</sup>: value less than -0.001; 0.000<sup>2</sup>: value less than 0.001

**Table S8** Mortality and inpatient days comparison between NAKI and AKI groups (n = 116).

| □                                        | NAKI       | AKI        |
|------------------------------------------|------------|------------|
| Death, n (%)                             | 6 (10.3%)  | 8 (13.8%)  |
| Inpatient days <sup>#</sup> (mean ± SEM) | 22.0 ± 2.5 | 23.7 ± 2.7 |

Note: <sup>#</sup> (Inpatient days) were calculated from the date of AKI onset (for AKI patients) or from the study enrollment date (for non-AKI controls) until hospital discharge. For patients with a fatal outcome, the time of death is considered the time of discharge.

**Table S9** Logistic regression analysis of renal function recovery at d3 and metabolite concentrations at AKI onset.

| Metabolite             | Model   | OR (95% CI)           | <i>p</i> |
|------------------------|---------|-----------------------|----------|
| U.Xanthine (ng/mL)     | Model 1 | 0.953 (0.917 - 0.991) | 0.016    |
|                        | Model 2 | 0.952 (0.914 - 0.991) | 0.018    |
|                        | Model 3 | 0.951 (0.912 - 0.992) | 0.021    |
|                        | Model 4 | 0.956 (0.914 - 1.000) | < 0.05   |
| U.Hypoxanthine (ng/mL) | Model 1 | 0.937 (0.882 - 0.995) | 0.035    |
|                        | Model 2 | 0.936 (0.879 - 0.996) | 0.038    |
|                        | Model 3 | 0.934 (0.873 - 1.000) | 0.049    |
|                        | Model 4 | 0.950 (0.884 - 1.021) | 0.166    |

Notes: d3: three days after AKI-onset. Model 1: Adjusted by metabolites concentration. Model 2: Adjusted by gender, age, metabolites concentration. Model 3: Adjusted by susceptibility factors (tumor, CKD, DM), gender, age, metabolites concentration. Model 4: Adjusted by exposure factors (shock, sepsis, trauma), susceptibility factors (tumor, CKD, DM), gender, age, metabolites concentration. OR: Odds ratio.

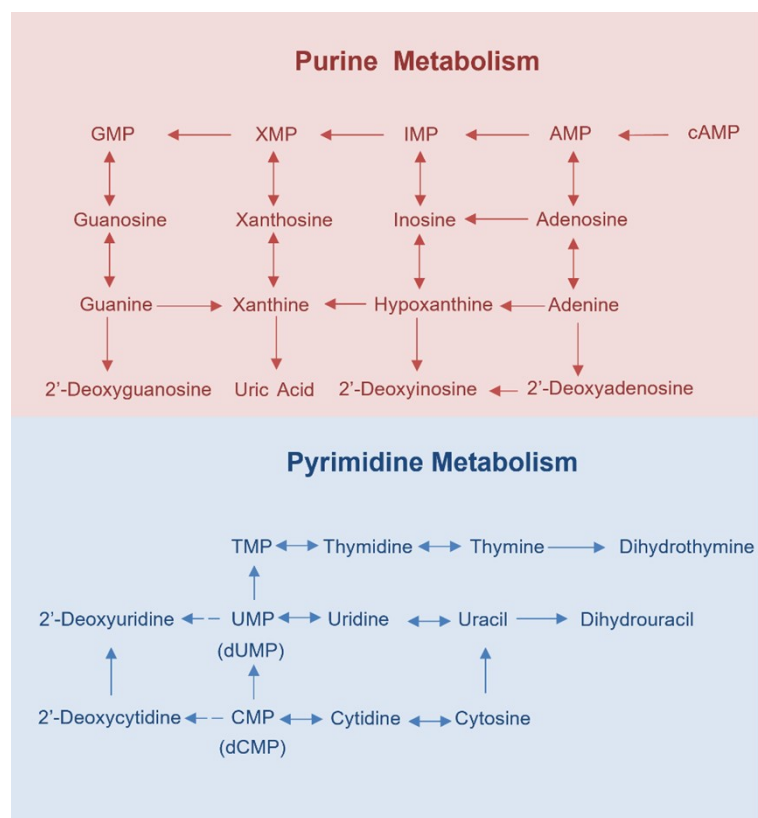

**Figure S1** The schematic view of purine and pyrimidine metabolism

Note: cAMP, adenosine cyclic 3',5'-monophosphate; GMP, guanosine 5'-monophosphate disodium salt; IMP, inosine 5'-monophosphate; XMP, xanthosine 5'-monophosphate sodium salt; AMP, 5'-monophosphate disodium salt; UMP, uridine 5'-monophosphate disodium salt; CMP, cytidine 5'-monophosphate; TMP, thymidine 5'-monophosphate sodium salt

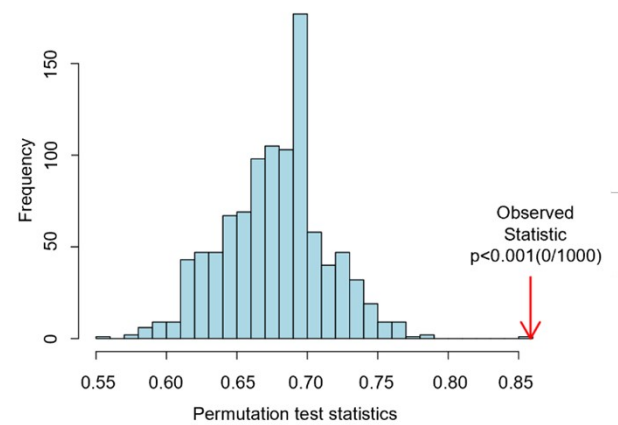

**Figure S2** Permutation test of PLS-DA score plot

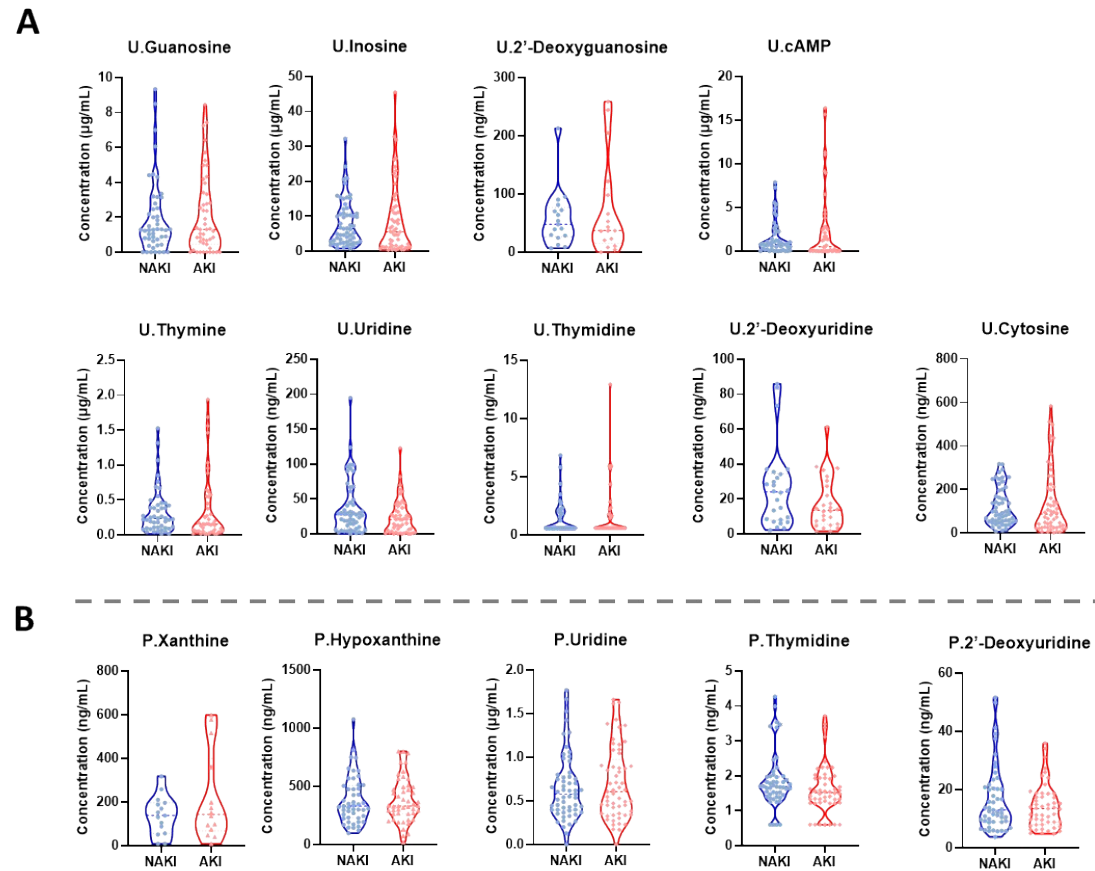

**Figure S3** Purines and pyrimidines differences in urine (A) and plasma (B) samples of NAKI and AKI groups

U. represents urinary, P. represents plasma



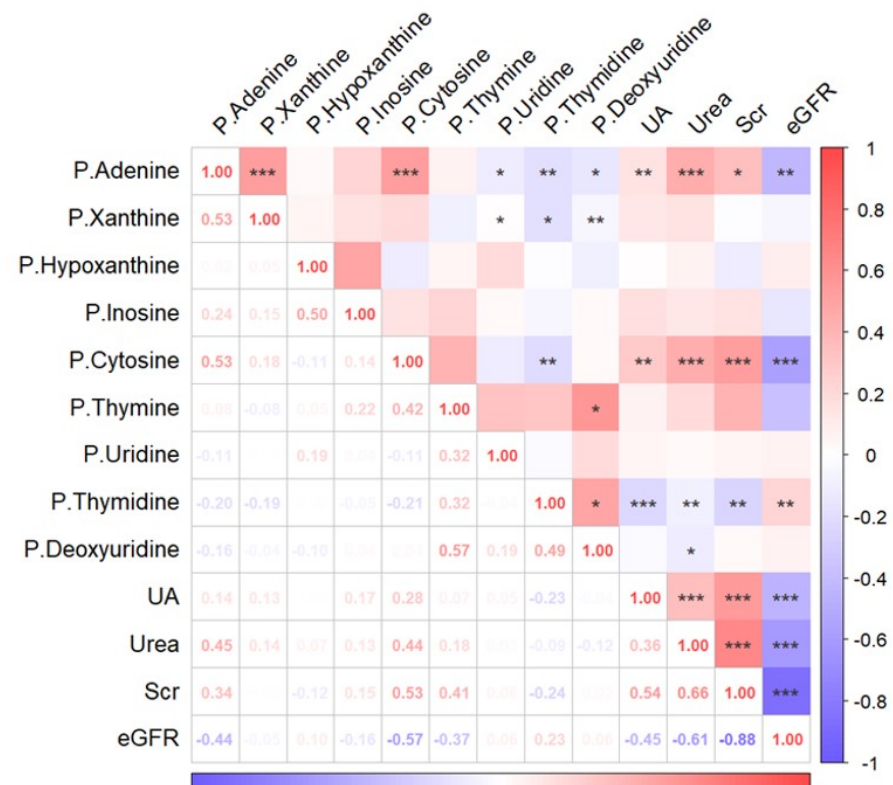

**Figure S4** Correlation hot plot between metabolites and kidney function indicators in plasma

Note: \* $p < 0.05$ , \*\* $p < 0.01$ , \*\*\* $p < 0.001$ . P. represents plasma.

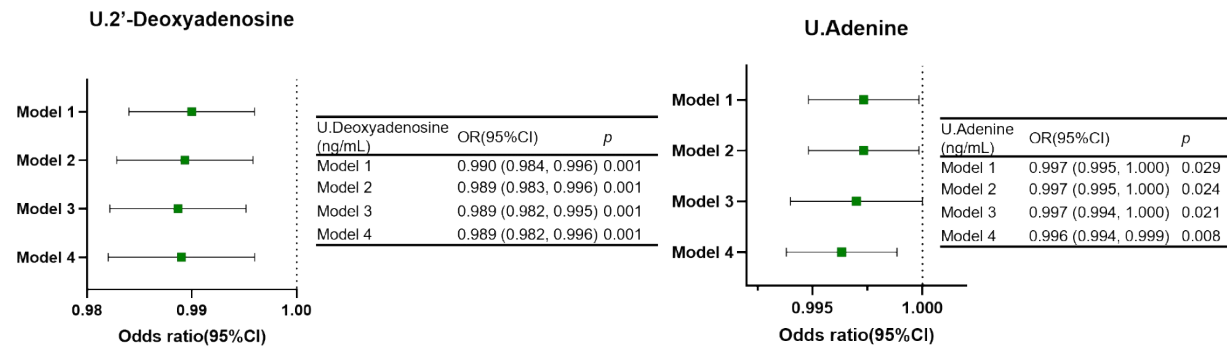

**Figure S5** Binary logistic regression models of risk factors for AKI occurrence in urine and plasma

Notes:

Model 1: Adjusted by metabolites concentration.

Model 2: Adjusted by gender, age, metabolites concentration.

Model 3: Adjusted by susceptibility factors (tumor, CKD, DM), gender, age, metabolites concentration.

Model 4: Adjusted by exposure factors (shock, sepsis, trauma), susceptibility factors (tumor, CKD, DM), gender, age, metabolites concentration.

OR: Odds ratio.

Based on the KDIGO criteria, patients in the AKI group were stratified into two subgroups: KDIGO Stage 1 and a combined KDIGO Stage 2/3 group. Stages 2 and 3 were merged due to lower patient numbers in these advanced stages compared with Stage 1. After normality transformation, the data were compared between these two subgroups using a two-sample t-test. The resulting p-values were adjusted for multiple comparisons via the False Discovery Rate (FDR) method, with a significance threshold of 0.05. The outcomes of this analysis were shown in Figure S6.

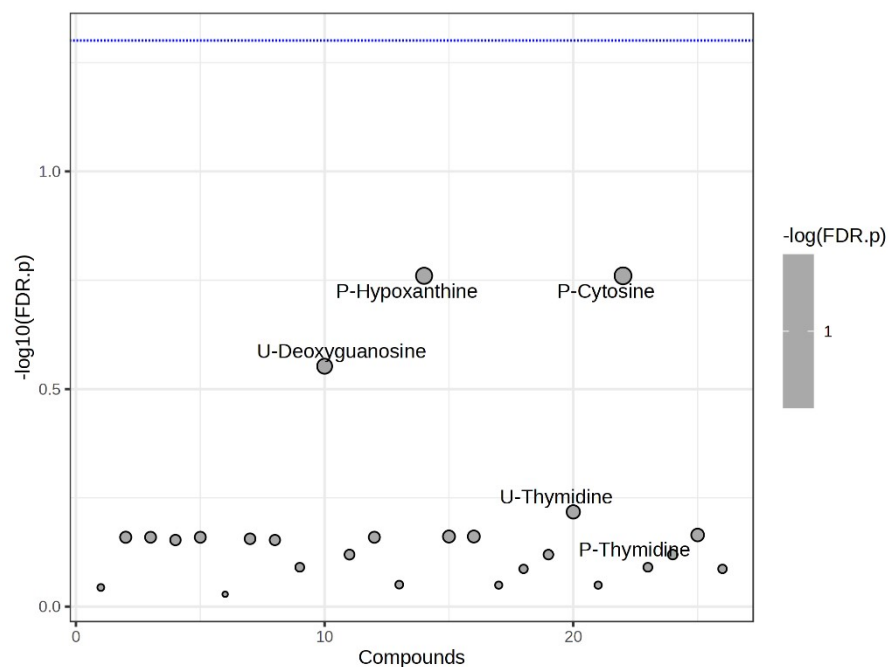

**Figure S6** Comparison of nucleotide metabolite levels between KDIGO stage 1 and combined stages 2/3
